# Supplementary material for: Rap1 deficiency-provoked paracrine dysfunction impairs immunosuppressive potency of mesenchymal stem cells in allograft rejection of heart transplantation
Source: PubMed Central journal article supplement (PMC5842217; doi:10.1038/s41419-018-0414-3), 2018-03-07
Supplement: 41419_2018_414_MOESM2_ESM.pdf [file 41419_2018_414_MOESM2_ESM.pdf]

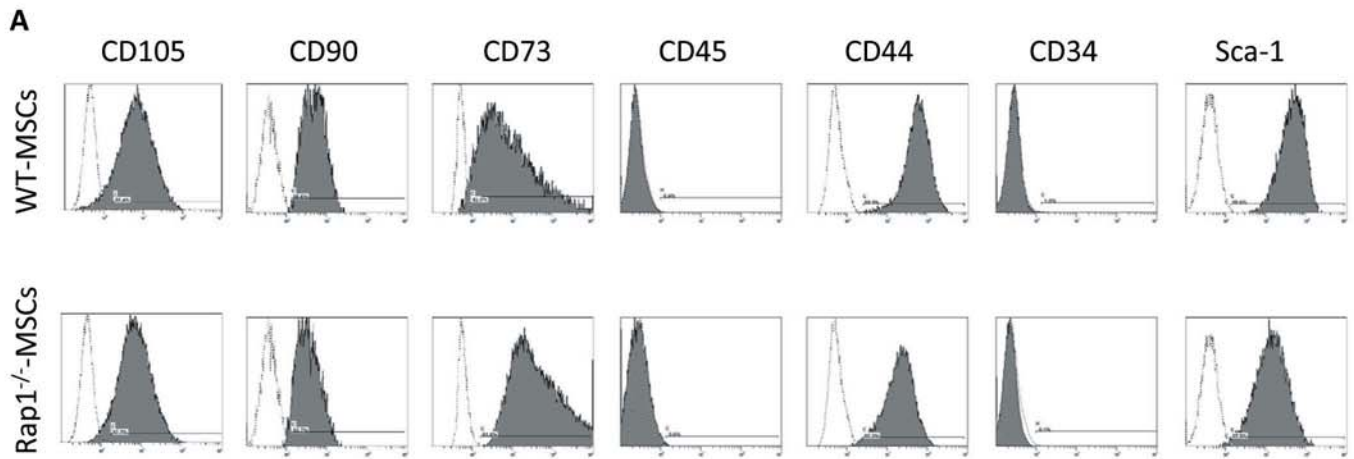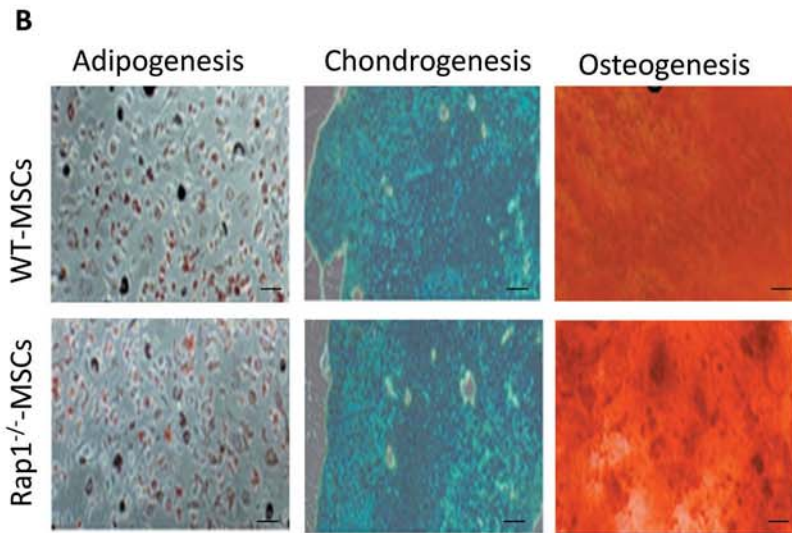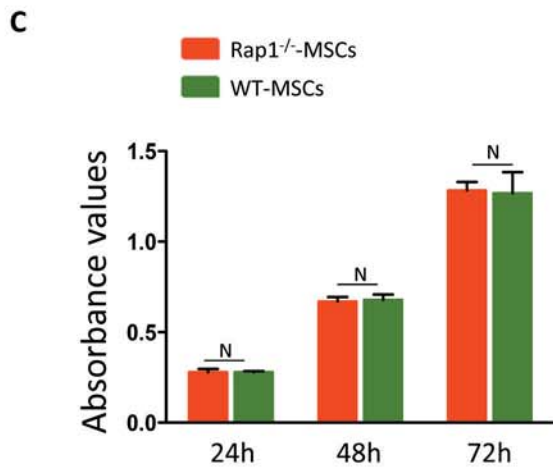

Supplementary Figure 1
